# Supplementary material
Source: ML conference proceedings conference paper supplement (https://proceedings.mlr.press/v48/xub16.html)
Supplement: Supplementary file [file xub16-supp.pdf]

---

# Matrix Eigen-decomposition via Doubly Stochastic Riemannian Optimization: Supplementary Material

---

**Zhiqiang Xu**

XUZQ@I2R.A-STAR.EDU.SG

**Peilin Zhao**

ZHAOP@I2R.A-STAR.EDU.SG

**Jianneng Cao**

CAOJN@I2R.A-STAR.EDU.SG

**Xiaoli Li**

XLLI@I2R.A-STAR.EDU.SG

Institute for Infocomm Research, A\*STAR, Singapore

## Preparation

First, based on the definitions of  $\mathbf{A}_t$ ,  $\mathbf{Y}_t$ ,  $\tilde{\mathbf{Z}}_t$  and  $\mathbf{Z}_t$ , we can write

$$g_t = G(s_t, r_t, \mathbf{X}_t) = p_{s_t}^{-1} p_{r_t}^{-1} (\mathbf{I} - \mathbf{X}_t \mathbf{X}_t^\top) (\mathbf{E}_{s_t} \odot \mathbf{A}) (\mathbf{E}_{r_t} \odot \mathbf{X}) = (\mathbf{I} - \mathbf{X}_t \mathbf{X}_t^\top) \mathbf{A}_t \mathbf{Y}_t.$$

Then from (6), we have

$$\mathbf{X}_{t+1} = \mathbf{X}_t + \alpha_t g_t \mathbf{W}_t - \frac{\alpha_t^2}{2} \mathbf{X}_t g_t^\top g_t \mathbf{W}_t.$$

Since

$$\mathbf{W}_t = (\mathbf{I} + \frac{\alpha_t^2}{4} g_t^\top g_t)^{-1} = \mathbf{I} - \frac{\alpha_t^2}{4} g_t^\top g_t + O(\alpha_t^4),$$

we get

$$\mathbf{X}_{t+1} = \mathbf{X}_t + \alpha_t \mathbf{A}_t \mathbf{Y}_t - \alpha_t \mathbf{X}_t \mathbf{X}_t^\top \mathbf{A}_t \mathbf{Y}_t - \frac{\alpha_t^2}{2} \mathbf{X}_t g_t^\top g_t - O(\alpha_t^3).$$

Let  $\mathcal{F}_t$  be the set of all the random variables seen thus far<sup>1</sup> (i.e., from 0 to  $t$ ).

## Proof of Lemma 4.4

*Proof.* The proof technique follows (Balsubramani et al., 2013) and (Xie et al., 2015). Note that for two square matrices  $\mathbf{Q}_i$ ,  $i = 1, 2$ , their products  $\mathbf{Q}_1 \mathbf{Q}_2$  and  $\mathbf{Q}_2 \mathbf{Q}_1$  have the same spectrum. The spectral norm (i.e., matrix 2-norm) is orthogonal invariant. Hence, we can write

$$\begin{aligned} \lambda_{\min}(\mathbf{Z}_t^\top \mathbf{V} \mathbf{V}^\top \mathbf{Z}_t) &= \lambda_{\min}(\mathbf{V}^\top \mathbf{Z}_t \mathbf{Z}_t^\top \mathbf{V}) = \min_{y \neq 0} \frac{\|\mathbf{V}^\top \mathbf{Z}_t y\|_2^2}{\|y\|_2^2} = \min_{y \neq 0} \frac{\|\mathbf{V}^\top \mathbf{Z}_t y\|_2^2}{\|\mathbf{Z}_t y\|_2^2} \\ &= \min_{y \neq 0} \frac{\|\mathbf{V}^\top (\mathbf{X}_t + \alpha_t \mathbf{A}_t \mathbf{Y}_t) y\|_2^2}{\|(\mathbf{X}_t + \alpha_t \mathbf{A}_t \mathbf{Y}_t) y\|_2^2}. \end{aligned}$$

---

<sup>1</sup>Mathematically, it's known as a filtration, i.e., sub-sigma algebras such that  $\mathcal{F}_t \subset \mathcal{F}_{t+1}$ .

First, we have the following two inequalities:

$$\begin{aligned} \|\mathbf{V}^\top(\mathbf{X}_t + \alpha_t \mathbf{A}_t \mathbf{Y}_t)y\|_2^2 &\geq \|\mathbf{V}^\top \mathbf{X}_t y\|_2^2 + 2\alpha_t \langle \mathbf{V}^\top \mathbf{X}_t y, \mathbf{V}^\top \mathbf{A}_t \mathbf{Y}_t y \rangle \\ \|(\mathbf{X}_t + \alpha_t \mathbf{A}_t \mathbf{Y}_t)y\|_2^2 &= \|\mathbf{X}_t y\|_2^2 + 2\alpha_t \langle \mathbf{X}_t y, \mathbf{A}_t \mathbf{Y}_t y \rangle + \alpha_t^2 \|\mathbf{A}_t \mathbf{Y}_t y\|_2^2 \\ &= \|y\|_2^2 + 2\alpha_t \langle \mathbf{X}_t y, \mathbf{A}_t \mathbf{Y}_t y \rangle + \alpha_t^2 \|\mathbf{A}_t \mathbf{Y}_t y\|_2^2 \\ &\leq \|y\|_2^2 + 2\alpha_t \langle \mathbf{X}_t y, \mathbf{A}_t \mathbf{Y}_t y \rangle + \alpha_t^2 \|\mathbf{A}_t \mathbf{Y}_t\|_2^2 \|y\|_2^2. \end{aligned}$$

Letting  $z = y/\|y\|_2$ , then  $\|z\|_2 = 1$  and we get

$$\begin{aligned} &\|\mathbf{V}^\top(\mathbf{X}_t + \alpha_t \mathbf{A}_t \mathbf{X}_t)y\|_2^2 / \|(\mathbf{X}_t + \alpha_t \mathbf{A}_t \mathbf{Y}_t)y\|_2^2 \\ &\geq \|\mathbf{V}^\top \mathbf{X}_t y\|_2^2 + 2\alpha_t \langle \mathbf{V}^\top \mathbf{X}_t y, \mathbf{V}^\top \mathbf{A}_t \mathbf{Y}_t y \rangle / (\|y\|_2^2 + 2\alpha_t \langle \mathbf{X}_t y, \mathbf{A}_t \mathbf{Y}_t y \rangle + \alpha_t^2 \|\mathbf{A}_t \mathbf{Y}_t\|_2^2 \|y\|_2^2) \\ &= \|\mathbf{V}^\top \mathbf{X}_t z\|_2^2 + 2\alpha_t \langle \mathbf{V}^\top \mathbf{X}_t z, \mathbf{V}^\top \mathbf{A}_t \mathbf{Y}_t z \rangle / (1 + 2\alpha_t \langle \mathbf{X}_t z, \mathbf{A}_t \mathbf{Y}_t z \rangle + \alpha_t^2 \|\mathbf{A}_t \mathbf{Y}_t\|_2^2) \\ &\geq (\|\mathbf{V}^\top \mathbf{X}_t z\|_2^2 + 2\alpha_t \langle \mathbf{V}^\top \mathbf{X}_t z, \mathbf{V}^\top \mathbf{A}_t \mathbf{Y}_t z \rangle) (1 - 2\alpha_t \langle \mathbf{X}_t z, \mathbf{A}_t \mathbf{Y}_t z \rangle - \alpha_t^2 \|\mathbf{A}_t \mathbf{Y}_t\|_2^2) \\ &\geq \|\mathbf{V}^\top \mathbf{X}_t z\|_2^2 + 2\alpha_t \langle \mathbf{V}^\top \mathbf{X}_t z, \mathbf{V}^\top \mathbf{A}_t \mathbf{Y}_t z \rangle - 2\alpha_t \|\mathbf{V}^\top \mathbf{X}_t z\|_2^2 \langle \mathbf{X}_t z, \mathbf{A}_t \mathbf{Y}_t z \rangle - 5\alpha_t^2 \|\mathbf{A}_t \mathbf{Y}_t\|_2^2 - 2\alpha_t^3 \|\mathbf{A}_t \mathbf{Y}_t\|_2^3 \\ &= \|\mathbf{V}^\top \mathbf{X}_t z\|_2^2 + 2\alpha_t z^\top \mathbf{X}_t^\top (\mathbf{V}\mathbf{V}^\top - \|\mathbf{V}^\top \mathbf{X}_t z\|_2^2 \mathbf{I}) \mathbf{A}_t \mathbf{Y}_t z - 5\alpha_t^2 \|\mathbf{A}_t \mathbf{Y}_t\|_2^2 - 2\alpha_t^3 \|\mathbf{A}_t \mathbf{Y}_t\|_2^3. \end{aligned}$$

Since  $\|\mathbf{V}^\top \mathbf{X}_t z\|_2^2 + \|\mathbf{V}_\perp^\top \mathbf{X}_t z\|_2^2 = \|\mathbf{X}_t z\|_2^2 = \|z\|_2^2 = 1$ , we have

$$\begin{aligned} \mathbf{V}\mathbf{V}^\top - \|\mathbf{V}^\top \mathbf{X}_t z\|_2^2 \mathbf{I} &= \mathbf{V}\mathbf{V}^\top - \|\mathbf{V}^\top \mathbf{X}_t z\|_2^2 (\mathbf{V}\mathbf{V}^\top + \mathbf{V}_\perp \mathbf{V}_\perp^\top) \\ &= \|\mathbf{V}_\perp^\top \mathbf{X}_t z\|_2^2 \mathbf{V}\mathbf{V}^\top - \|\mathbf{V}^\top \mathbf{X}_t z\|_2^2 \mathbf{V}_\perp \mathbf{V}_\perp^\top. \end{aligned}$$

Then

$$\begin{aligned} &\|\mathbf{V}^\top(\mathbf{X}_t + \alpha_t \mathbf{A}_t \mathbf{Y}_t)y\|_2^2 / \|(\mathbf{X}_t + \alpha_t \mathbf{A}_t \mathbf{Y}_t)y\|_2^2 \\ &\geq \|\mathbf{V}^\top \mathbf{X}_t z\|_2^2 + 2\alpha_t z^\top \mathbf{X}_t^\top (\|\mathbf{V}_\perp^\top \mathbf{X}_t z\|_2^2 \mathbf{V}\mathbf{V}^\top - \|\mathbf{V}^\top \mathbf{X}_t z\|_2^2 \mathbf{V}_\perp \mathbf{V}_\perp^\top) \mathbf{A}_t \mathbf{Y}_t z \\ &\quad - 5\alpha_t^2 \|\mathbf{A}_t \mathbf{Y}_t\|_2^2 - 2\alpha_t^3 \|\mathbf{A}_t \mathbf{Y}_t\|_2^3. \end{aligned}$$

Suppose  $\tilde{y}$  makes

$$\lambda_{\min}(\mathbf{V}^\top \mathbf{Z}_t \mathbf{Z}_t^\top \mathbf{V}) = \|\mathbf{V}^\top(\mathbf{X}_t + \alpha_t \mathbf{A}_t \mathbf{Y}_t)\tilde{y}\|_2^2 / \|(\mathbf{X}_t + \alpha_t \mathbf{A}_t \mathbf{Y}_t)\tilde{y}\|_2^2$$

and accordingly let  $\tilde{z} = \tilde{y}/\|\tilde{y}\|_2$ . Further denote  $b_t = 5\alpha_t^2 \|\mathbf{A}_t \mathbf{Y}_t\|_2^2 + 2\alpha_t^3 \|\mathbf{A}_t \mathbf{Y}_t\|_2^3$ . Then

$$\begin{aligned} &\lambda_{\min}(\mathbf{V}^\top \mathbf{Z}_t \mathbf{Z}_t^\top \mathbf{V}) \\ &\geq \|\mathbf{V}^\top \mathbf{X}_t \tilde{z}\|_2^2 + 2\alpha_t \tilde{z}^\top \mathbf{X}_t^\top (\|\mathbf{V}_\perp^\top \mathbf{X}_t \tilde{z}\|_2^2 \mathbf{V}\mathbf{V}^\top - \|\mathbf{V}^\top \mathbf{X}_t \tilde{z}\|_2^2 \mathbf{V}_\perp \mathbf{V}_\perp^\top) \mathbf{A}_t \mathbf{Y}_t \tilde{z} - b_t. \end{aligned}$$

Let  $a_t = \mathbb{E}[b_t | \mathcal{F}_{t-1}]$ . Then we have

$$\begin{aligned} &\mathbb{E}[\lambda_{\min}(\mathbf{V}^\top \mathbf{Z}_t \mathbf{Z}_t^\top \mathbf{V}) | \mathcal{F}_{t-1}] \\ &\geq \|\mathbf{V}^\top \mathbf{X}_t \tilde{z}\|_2^2 + 2\alpha_t \tilde{z}^\top \mathbf{X}_t^\top [\|\mathbf{V}_\perp^\top \mathbf{X}_t \tilde{z}\|_2^2 \mathbf{V}\mathbf{V}^\top - \|\mathbf{V}^\top \mathbf{X}_t \tilde{z}\|_2^2 \mathbf{V}_\perp \mathbf{V}_\perp^\top] \mathbb{E}[\mathbf{A}_t \mathbf{Y}_t | \mathcal{F}_{t-1}] \tilde{z} - a_t \\ &= \|\mathbf{V}^\top \mathbf{X}_t \tilde{z}\|_2^2 + 2\alpha_t \tilde{z}^\top \mathbf{X}_t^\top [\|\mathbf{V}_\perp^\top \mathbf{X}_t \tilde{z}\|_2^2 \mathbf{V}\mathbf{V}^\top - \|\mathbf{V}^\top \mathbf{X}_t \tilde{z}\|_2^2 \mathbf{V}_\perp \mathbf{V}_\perp^\top] \mathbf{A} \mathbf{X}_t \tilde{z} - a_t \\ &= \|\mathbf{V}^\top \mathbf{X}_t \tilde{z}\|_2^2 + 2\alpha_t \|\mathbf{V}_\perp^\top \mathbf{X}_t \tilde{z}\|_2^2 \tilde{z}^\top \mathbf{X}_t^\top \mathbf{V} \Sigma \mathbf{V}^\top \mathbf{X}_t \tilde{z} - 2\alpha_t \|\mathbf{V}^\top \mathbf{X}_t \tilde{z}\|_2^2 \tilde{z}^\top \mathbf{X}_t^\top \mathbf{V}_\perp \Sigma_\perp \mathbf{V}_\perp^\top \mathbf{X}_t \tilde{z} - a_t \\ &\geq \|\mathbf{V}^\top \mathbf{X}_t \tilde{z}\|_2^2 + 2\alpha_t \lambda_q \|\mathbf{V}_\perp^\top \mathbf{X}_t \tilde{z}\|_2^2 \tilde{z}^\top \mathbf{X}_t^\top \mathbf{V}\mathbf{V}^\top \mathbf{X}_t \tilde{z} - 2\alpha_t \lambda_{q+1} \|\mathbf{V}^\top \mathbf{X}_t \tilde{z}\|_2^2 \tilde{z}^\top \mathbf{X}_t^\top \mathbf{V}_\perp \mathbf{V}_\perp^\top \mathbf{X}_t \tilde{z} - a_t \\ &= \|\mathbf{V}^\top \mathbf{X}_t \tilde{z}\|_2^2 + 2\alpha_t (\lambda_q - \lambda_{q+1}) \|\mathbf{V}^\top \mathbf{X}_t \tilde{z}\|_2^2 \|\mathbf{V}_\perp^\top \mathbf{X}_t \tilde{z}\|_2^2 - a_t \\ &= \|\mathbf{V}^\top \mathbf{X}_t \tilde{z}\|_2^2 (1 + 2\alpha_t \tau (1 - \|\mathbf{V}^\top \mathbf{X}_t \tilde{z}\|_2^2)) - a_t. \end{aligned}$$

When  $\alpha_t < \frac{1}{4\tau}$ , the function  $f(x) = x[1 + a(1-x)] = -a(x - \frac{a+1}{2a})^2 + \frac{(a+1)^2}{4a}$  is monotonically increasing on  $(-\infty, 1]$  where  $a = 2\alpha_t \tau$ . Since  $1 \geq \|\mathbf{V}^\top \mathbf{X}_t \tilde{z}\|_2^2 \geq \lambda_{\min}(\mathbf{V}^\top \mathbf{X}_t \mathbf{X}_t^\top \mathbf{V})$ , we get

$$\begin{aligned} &\|\mathbf{V}^\top \mathbf{X}_t \tilde{z}\|_2^2 (1 + 2\alpha_t \tau (1 - \|\mathbf{V}^\top \mathbf{X}_t \tilde{z}\|_2^2)) - a_t \\ &\geq \lambda_{\min}(\mathbf{V}^\top \mathbf{X}_t \mathbf{X}_t^\top \mathbf{V}) (1 + 2\alpha_t \tau (1 - \lambda_{\min}(\mathbf{V}^\top \mathbf{X}_t \mathbf{X}_t^\top \mathbf{V}))) - a_t. \end{aligned}$$

Hence, we obtain

$$\mathbb{E}[\lambda_{\min}(\mathbf{V}^\top \mathbf{Z}_t \mathbf{Z}_t^\top \mathbf{V}) | \mathcal{F}_{t-1}] \geq \lambda_{\min}(\mathbf{V}^\top \mathbf{X}_t \mathbf{X}_t^\top \mathbf{V})(1 + 2\alpha_t \tau(1 - \lambda_{\min}(\mathbf{V}^\top \mathbf{X}_t \mathbf{X}_t^\top \mathbf{V}))) - a_t.$$

By the assumption  $\cos^2 \langle \mathbf{X}_t, \mathbf{V} \rangle = \lambda_{\min}(\mathbf{V}^\top \mathbf{X}_t \mathbf{X}_t^\top \mathbf{V}) \geq 1/2$ , we get

$$\begin{aligned} 1 - \mathbb{E}[\lambda_{\min}(\mathbf{V}^\top \mathbf{Z}_t \mathbf{Z}_t^\top \mathbf{V}) | \mathcal{F}_{t-1}] &\leq 1 - \lambda_{\min}(\mathbf{V}^\top \mathbf{X}_t \mathbf{X}_t^\top \mathbf{V})(1 + 2\alpha_t \tau(1 - \lambda_{\min}(\mathbf{V}^\top \mathbf{X}_t \mathbf{X}_t^\top \mathbf{V}))) + a_t \\ &= (1 - \lambda_{\min}(\mathbf{V}^\top \mathbf{X}_t \mathbf{X}_t^\top \mathbf{V}))(1 - 2\alpha_t \tau \lambda_{\min}(\mathbf{V}^\top \mathbf{X}_t \mathbf{X}_t^\top \mathbf{V})) + a_t \\ &\leq (1 - \lambda_{\min}(\mathbf{V}^\top \mathbf{X}_t \mathbf{X}_t^\top \mathbf{V}))(1 - \alpha_t \tau) + a_t, \end{aligned}$$

and thus

$$\mathbb{E}[1 - \mathbb{E}[\lambda_{\min}(\mathbf{V}^\top \mathbf{Z}_t \mathbf{Z}_t^\top \mathbf{V}) | \mathcal{F}_{t-1}]] \leq (1 - \alpha_t \tau) \mathbb{E}[1 - \lambda_{\min}(\mathbf{V}^\top \mathbf{X}_t \mathbf{X}_t^\top \mathbf{V})] + \mathbb{E}[a_t],$$

where

$$\mathbb{E}[a_t] = 5\alpha_t^2 \mathbb{E}[\|\mathbf{A}_t \mathbf{Y}_t\|_2^2] + O(\alpha_t^3) \leq 5\alpha_t^2 \mathbb{E}[\|\mathbf{A}_t\|_2^2] \mathbb{E}[\|\mathbf{Y}_t\|_2^2] + O(\alpha_t^3).$$

Therefore, we arrive at

$$1 - \mathbb{E}[\lambda_{\min}(\mathbf{V}^\top \mathbf{Z}_t \mathbf{Z}_t^\top \mathbf{V})] \leq (1 - \alpha_t \tau)(1 - \mathbb{E}[\lambda_{\min}(\mathbf{V}^\top \mathbf{X}_t \mathbf{X}_t^\top \mathbf{V})]) + 5\alpha_t^2 \mathbb{E}[\|\mathbf{A}_t\|_2^2] \mathbb{E}[\|\mathbf{Y}_t\|_2^2] + O(\alpha_t^3),$$

i.e.,

$$1 - \mathbb{E}[\cos^2 \langle \mathbf{Z}_t, \mathbf{V} \rangle] \leq (1 - \alpha_t \tau)(1 - \mathbb{E}[\cos^2 \langle \mathbf{X}_t, \mathbf{V} \rangle]) + 5\beta_t \alpha_t^2 + O(\alpha_t^3).$$

□

## Proof of Lemma 4.5

*Proof.* Let  $\Phi(\alpha_t) = (\tilde{\mathbf{Z}}_t^\top \tilde{\mathbf{Z}}_t)^{-1}$ . Then  $\mathbf{Z}_t \mathbf{Z}_t^\top = \tilde{\mathbf{Z}}_t \Phi(\alpha_t) \tilde{\mathbf{Z}}_t^\top$  and

$$\begin{aligned} \Phi(\alpha_t) &= \Phi(0) + \Phi'(0)\alpha_t + \frac{1}{2}\Phi''(0)\alpha_t^2 \\ \frac{d\Phi(\alpha_t)}{d\alpha_t} &= -\Phi(\alpha_t) \frac{d\Phi^{-1}(\alpha_t)}{d\alpha_t} \Phi(\alpha_t) \\ \frac{d^2\Phi(\alpha_t)}{d\alpha_t^2} &= -\frac{d\Phi(\alpha_t)}{d\alpha_t} \frac{d\Phi^{-1}(\alpha_t)}{d\alpha_t} \Phi(\alpha_t) - \Phi(\alpha_t) \frac{d^2\Phi^{-1}(\alpha_t)}{d\alpha_t^2} \Phi(\alpha_t) - \Phi(\alpha_t) \frac{d\Phi^{-1}(\alpha_t)}{d\alpha_t} \frac{d\Phi(\alpha_t)}{d\alpha_t} \\ \Phi^{-1}(\alpha_t) &= \tilde{\mathbf{Z}}_t^\top \tilde{\mathbf{Z}}_t = \mathbf{I} + \alpha_t \mathbf{X}_t^\top \mathbf{A}_t \mathbf{Y}_t + \alpha_t \mathbf{Y}_t^\top \mathbf{A}_t^\top \mathbf{X}_t + \alpha_t^2 \mathbf{Y}_t^\top \mathbf{A}_t^\top \mathbf{A}_t \mathbf{Y}_t. \end{aligned}$$

Hence, we can get

$$\begin{aligned} \Phi(0) &= \mathbf{I} \\ \Phi'(0) &= -(\mathbf{X}_t^\top \mathbf{A}_t \mathbf{Y}_t + \mathbf{Y}_t^\top \mathbf{A}_t^\top \mathbf{X}_t) \\ \Phi''(0) &= 2[\Phi'(0)]^2 - 2\mathbf{Y}_t^\top \mathbf{A}_t^\top \mathbf{A}_t \mathbf{Y}_t \\ &= 2(\mathbf{X}_t^\top \mathbf{A}_t \mathbf{Y}_t \mathbf{X}_t^\top \mathbf{A}_t \mathbf{Y}_t + \mathbf{X}_t^\top \mathbf{A}_t \mathbf{Y}_t \mathbf{Y}_t^\top \mathbf{A}_t^\top \mathbf{X}_t + \mathbf{Y}_t^\top \mathbf{A}_t^\top \mathbf{X}_t \mathbf{X}_t^\top \mathbf{A}_t \mathbf{Y}_t + \\ &\quad \mathbf{Y}_t^\top \mathbf{A}_t^\top \mathbf{X}_t \mathbf{Y}_t^\top \mathbf{A}_t^\top \mathbf{X}_t - \mathbf{Y}_t^\top \mathbf{A}_t^\top \mathbf{A}_t \mathbf{Y}_t) \end{aligned}$$

and

$$\begin{aligned} \mathbf{Z}_t \mathbf{Z}_t^\top &= (\mathbf{X}_t + \alpha_t \mathbf{A}_t \mathbf{Y}_t)(\mathbf{X}_t + \alpha_t \mathbf{A}_t \mathbf{Y}_t)^\top + \alpha_t (\mathbf{X}_t + \alpha_t \mathbf{A}_t \mathbf{Y}_t) \Phi'(0) (\mathbf{X}_t + \alpha_t \mathbf{A}_t \mathbf{Y}_t)^\top + \\ &\quad (1/2)\alpha_t^2 (\mathbf{X}_t + \alpha_t \mathbf{A}_t \mathbf{Y}_t) \Phi''(0) (\mathbf{X}_t + \alpha_t \mathbf{A}_t \mathbf{Y}_t)^\top \\ &\triangleq \Delta_1 + \alpha_t \Delta_2 + \frac{1}{2}\alpha_t^2 \Delta_3. \end{aligned}$$

Expanding each item above, we have

$$\begin{aligned}
 \Delta_1 &= \mathbf{X}_t \mathbf{X}_t^\top + \alpha_t \mathbf{X}_t \mathbf{Y}_t^\top \mathbf{A}_t^\top + \alpha_t \mathbf{A}_t \mathbf{Y}_t \mathbf{X}_t^\top + \alpha_t^2 \mathbf{A}_t \mathbf{Y}_t \mathbf{Y}_t^\top \mathbf{A}_t^\top \\
 \Delta_2 &= -(\mathbf{X}_t + \alpha_t \mathbf{A}_t \mathbf{Y}_t)(\mathbf{X}_t^\top \mathbf{A}_t \mathbf{Y}_t + \mathbf{Y}_t^\top \mathbf{A}_t^\top \mathbf{X}_t)(\mathbf{X}_t + \alpha_t \mathbf{A}_t \mathbf{Y}_t)^\top \\
 &= -\mathbf{X}_t \mathbf{X}_t^\top \mathbf{A}_t \mathbf{Y}_t \mathbf{X}_t^\top - \mathbf{X}_t \mathbf{Y}_t^\top \mathbf{A}_t^\top \mathbf{X}_t \mathbf{X}_t^\top \\
 &\quad -\alpha_t \mathbf{X}_t \mathbf{X}_t^\top \mathbf{A}_t \mathbf{Y}_t \mathbf{Y}_t^\top \mathbf{A}_t^\top - \alpha_t \mathbf{X}_t \mathbf{Y}_t^\top \mathbf{A}_t^\top \mathbf{X}_t \mathbf{Y}_t^\top \mathbf{A}_t^\top - \alpha_t \mathbf{A}_t \mathbf{Y}_t \mathbf{X}_t^\top \mathbf{A}_t \mathbf{Y}_t \mathbf{X}_t^\top - \alpha_t \mathbf{A}_t \mathbf{Y}_t \mathbf{Y}_t^\top \mathbf{A}_t^\top \mathbf{X}_t \mathbf{X}_t^\top \\
 &\quad -\alpha_t^2 \mathbf{A}_t \mathbf{Y}_t \mathbf{X}_t^\top \mathbf{A}_t \mathbf{Y}_t \mathbf{Y}_t^\top \mathbf{A}_t^\top - \alpha_t^2 \mathbf{A}_t \mathbf{Y}_t \mathbf{Y}_t^\top \mathbf{A}_t^\top \mathbf{X}_t \mathbf{Y}_t^\top \mathbf{A}_t^\top \\
 \Delta_3 &= 2(\mathbf{X}_t \mathbf{X}_t^\top \mathbf{A}_t \mathbf{Y}_t \mathbf{X}_t^\top \mathbf{A}_t \mathbf{Y}_t \mathbf{X}_t^\top + \mathbf{X}_t \mathbf{X}_t^\top \mathbf{A}_t \mathbf{Y}_t \mathbf{Y}_t^\top \mathbf{A}_t^\top \mathbf{X}_t \mathbf{X}_t^\top + \mathbf{X}_t \mathbf{Y}_t^\top \mathbf{A}_t^\top \mathbf{X}_t \mathbf{X}_t^\top \mathbf{A}_t \mathbf{Y}_t \mathbf{X}_t^\top \\
 &\quad + \mathbf{X}_t \mathbf{Y}_t^\top \mathbf{A}_t^\top \mathbf{X}_t \mathbf{Y}_t^\top \mathbf{A}_t^\top \mathbf{X}_t \mathbf{X}_t^\top - \mathbf{X}_t \mathbf{Y}_t^\top \mathbf{A}_t^\top \mathbf{A}_t \mathbf{Y}_t \mathbf{X}_t^\top) + O(\alpha_t).
 \end{aligned}$$

Accordingly,

$$\begin{aligned}
 \mathbf{Z}_t \mathbf{Z}_t^\top &= \mathbf{X}_t \mathbf{X}_t^\top + \alpha_t (\mathbf{X}_t \mathbf{Y}_t^\top \mathbf{A}_t^\top + \mathbf{A}_t \mathbf{Y}_t \mathbf{X}_t^\top - \mathbf{X}_t \mathbf{X}_t^\top \mathbf{A}_t \mathbf{Y}_t \mathbf{X}_t^\top - \mathbf{X}_t \mathbf{Y}_t^\top \mathbf{A}_t^\top \mathbf{X}_t \mathbf{X}_t^\top) \\
 &\quad + \alpha_t^2 (\mathbf{A}_t \mathbf{Y}_t \mathbf{Y}_t^\top \mathbf{A}_t^\top - \mathbf{X}_t \mathbf{X}_t^\top \mathbf{A}_t \mathbf{Y}_t \mathbf{Y}_t^\top \mathbf{A}_t^\top - \mathbf{X}_t \mathbf{Y}_t^\top \mathbf{A}_t^\top \mathbf{X}_t \mathbf{Y}_t^\top \mathbf{A}_t^\top - \mathbf{A}_t \mathbf{Y}_t \mathbf{X}_t^\top \mathbf{A}_t \mathbf{Y}_t \mathbf{X}_t^\top - \mathbf{A}_t \mathbf{Y}_t \mathbf{Y}_t^\top \mathbf{A}_t^\top \mathbf{X}_t \mathbf{X}_t^\top \\
 &\quad + \mathbf{X}_t \mathbf{X}_t^\top \mathbf{A}_t \mathbf{Y}_t \mathbf{X}_t^\top \mathbf{A}_t \mathbf{Y}_t \mathbf{X}_t^\top + \mathbf{X}_t \mathbf{X}_t^\top \mathbf{A}_t \mathbf{Y}_t \mathbf{Y}_t^\top \mathbf{A}_t^\top \mathbf{X}_t \mathbf{X}_t^\top + \mathbf{X}_t \mathbf{Y}_t^\top \mathbf{A}_t^\top \mathbf{X}_t \mathbf{X}_t^\top \mathbf{A}_t \mathbf{Y}_t \mathbf{X}_t^\top \\
 &\quad + \mathbf{X}_t \mathbf{Y}_t^\top \mathbf{A}_t^\top \mathbf{X}_t \mathbf{Y}_t^\top \mathbf{A}_t^\top \mathbf{X}_t \mathbf{X}_t^\top - \mathbf{X}_t \mathbf{Y}_t^\top \mathbf{A}_t^\top \mathbf{A}_t \mathbf{Y}_t \mathbf{X}_t^\top) \pm O(\alpha_t^3).
 \end{aligned}$$

On the other hand for  $\mathbf{X}_{t+1}$ , we have

$$\begin{aligned}
 &\mathbf{X}_{t+1} \mathbf{X}_{t+1}^\top \\
 &= (\mathbf{X}_t + \alpha_t \mathbf{A}_t \mathbf{Y}_t - \alpha_t \mathbf{X}_t \mathbf{X}_t^\top \mathbf{A}_t \mathbf{Y}_t - \frac{\alpha_t^2}{2} \mathbf{X}_t g_t^\top g_t - O(\alpha_t^3))(\mathbf{X}_t + \alpha_t \mathbf{A}_t \mathbf{Y}_t - \alpha_t \mathbf{X}_t \mathbf{X}_t^\top \mathbf{A}_t \mathbf{Y}_t - \frac{\alpha_t^2}{2} \mathbf{X}_t g_t^\top g_t - O(\alpha_t^3))^\top \\
 &= \mathbf{X}_t \mathbf{X}_t^\top + \alpha_t \mathbf{X}_t \mathbf{Y}_t^\top \mathbf{A}_t^\top - \alpha_t \mathbf{X}_t \mathbf{Y}_t^\top \mathbf{A}_t^\top \mathbf{X}_t \mathbf{X}_t^\top - \frac{\alpha_t^2}{2} \mathbf{X}_t g_t^\top g_t \mathbf{X}_t^\top + \\
 &\quad \alpha_t \mathbf{A}_t \mathbf{Y}_t \mathbf{X}_t^\top + \alpha_t^2 \mathbf{A}_t \mathbf{Y}_t \mathbf{Y}_t^\top \mathbf{A}_t^\top - \alpha_t^2 \mathbf{A}_t \mathbf{Y}_t \mathbf{Y}_t^\top \mathbf{A}_t^\top \mathbf{X}_t \mathbf{X}_t^\top - \\
 &\quad \alpha_t \mathbf{X}_t \mathbf{X}_t^\top \mathbf{A}_t \mathbf{Y}_t \mathbf{X}_t^\top - \alpha_t^2 \mathbf{X}_t \mathbf{X}_t^\top \mathbf{A}_t \mathbf{Y}_t \mathbf{Y}_t^\top \mathbf{A}_t^\top + \\
 &\quad \alpha_t^2 \mathbf{X}_t \mathbf{X}_t^\top \mathbf{A}_t \mathbf{Y}_t \mathbf{Y}_t^\top \mathbf{A}_t^\top \mathbf{X}_t \mathbf{X}_t^\top - \frac{\alpha_t^2}{2} \mathbf{X}_t g_t^\top g_t \mathbf{X}_t^\top \pm O(\alpha_t^3).
 \end{aligned}$$

Note that  $g_t = (\mathbf{I} - \mathbf{X}_t \mathbf{X}_t^\top) \mathbf{A}_t \mathbf{Y}_t$  and  $\mathbf{X}_t g_t^\top g_t \mathbf{X}_t^\top = \mathbf{X}_t \mathbf{Y}_t^\top \mathbf{A}_t^\top (\mathbf{I} - \mathbf{X}_t \mathbf{X}_t^\top) \mathbf{A}_t \mathbf{Y}_t \mathbf{X}_t^\top$ . Thus,

$$\begin{aligned}
 \mathbf{X}_{t+1} \mathbf{X}_{t+1}^\top &= \mathbf{X}_t \mathbf{X}_t^\top + \alpha_t (\mathbf{X}_t \mathbf{Y}_t^\top \mathbf{A}_t^\top - \mathbf{X}_t \mathbf{Y}_t^\top \mathbf{A}_t^\top \mathbf{X}_t \mathbf{X}_t^\top + \mathbf{A}_t \mathbf{Y}_t \mathbf{X}_t^\top - \mathbf{X}_t \mathbf{X}_t^\top \mathbf{A}_t \mathbf{Y}_t \mathbf{X}_t^\top) + \\
 &\quad \alpha_t^2 (\mathbf{A}_t \mathbf{Y}_t \mathbf{Y}_t^\top \mathbf{A}_t^\top - \mathbf{A}_t \mathbf{Y}_t \mathbf{Y}_t^\top \mathbf{A}_t^\top \mathbf{X}_t \mathbf{X}_t^\top - \mathbf{X}_t \mathbf{X}_t^\top \mathbf{A}_t \mathbf{Y}_t \mathbf{Y}_t^\top \mathbf{A}_t^\top + \mathbf{X}_t \mathbf{X}_t^\top \mathbf{A}_t \mathbf{Y}_t \mathbf{Y}_t^\top \mathbf{A}_t^\top \mathbf{X}_t \mathbf{X}_t^\top - \\
 &\quad \mathbf{X}_t \mathbf{Y}_t^\top \mathbf{A}_t^\top \mathbf{A}_t \mathbf{Y}_t \mathbf{X}_t^\top + \mathbf{X}_t \mathbf{Y}_t^\top \mathbf{A}_t^\top \mathbf{X}_t \mathbf{X}_t^\top \mathbf{A}_t \mathbf{Y}_t \mathbf{X}_t^\top) \pm O(\alpha_t^3).
 \end{aligned}$$

We find that

$$\mathbf{X}_{t+1} \mathbf{X}_{t+1}^\top = \mathbf{Z}_t \mathbf{Z}_t^\top - \alpha_t^2 \mathbf{M}_t \pm O(\alpha_t^3),$$

where  $\mathbf{M}_t = \mathbf{M}_t^\top$  and

$$\mathbf{M}_t = -\mathbf{X}_t \mathbf{Y}_t^\top \mathbf{A}_t^\top \mathbf{X}_t \mathbf{Y}_t^\top \mathbf{A}_t^\top - \mathbf{A}_t \mathbf{Y}_t \mathbf{X}_t^\top \mathbf{A}_t \mathbf{Y}_t \mathbf{X}_t^\top + \mathbf{X}_t \mathbf{X}_t^\top \mathbf{A}_t \mathbf{Y}_t \mathbf{X}_t^\top \mathbf{A}_t \mathbf{Y}_t \mathbf{X}_t^\top + \mathbf{X}_t \mathbf{Y}_t^\top \mathbf{A}_t^\top \mathbf{X}_t \mathbf{Y}_t^\top \mathbf{A}_t^\top \mathbf{X}_t \mathbf{X}_t^\top.$$

Hence, we can write

$$\begin{aligned}
 \lambda_{\min}(\mathbf{V}^\top \mathbf{X}_{t+1} \mathbf{X}_{t+1}^\top \mathbf{V}) &= \lambda_{\min}(\mathbf{V}^\top \mathbf{Z}_t \mathbf{Z}_t^\top \mathbf{V} - \alpha_t^2 \mathbf{V}^\top \mathbf{M}_t \mathbf{V}) \pm O(\alpha_t^3) \\
 &\geq \lambda_{\min}(\mathbf{V}^\top \mathbf{Z}_t \mathbf{Z}_t^\top \mathbf{V}) - \alpha_t^2 \lambda_{\max}(\mathbf{V}^\top \mathbf{M}_t \mathbf{V}) \pm O(\alpha_t^3).
 \end{aligned}$$

By the Poincare separation theorem,  $\lambda_{\max}(\mathbf{V}^\top \mathbf{M}_t \mathbf{V}) \leq \lambda_{\max}(\mathbf{M}_t)$ . Also note that  $\lambda_{\max}(\mathbf{M}_t) \leq \|\mathbf{M}_t\|_2$  and  $\|\mathbf{M}_t\|_2 \leq 4\|\mathbf{A}_t \mathbf{Y}_t\|_2^2$ . Then we get

$$\lambda_{\max}(\mathbf{V}^\top \mathbf{M}_t \mathbf{V}) \leq 4\|\mathbf{A}_t \mathbf{Y}_t\|_2^2 \leq 4\|\mathbf{A}_t\|_2^2 \|\mathbf{Y}_t\|_2^2$$

and finally arrive at

$$\lambda_{\min}(\mathbf{V}^\top \mathbf{X}_{t+1} \mathbf{X}_{t+1}^\top \mathbf{V}) \geq \lambda_{\min}(\mathbf{V}^\top \mathbf{Z}_t \mathbf{Z}_t^\top \mathbf{V}) - 4\alpha_t^2 \|\mathbf{A}_t\|_2^2 \|\mathbf{Y}_t\|_2^2 \pm O(\alpha_t^3),$$

i.e.,

$$\cos^2 \langle \mathbf{X}_{t+1}, \mathbf{V} \rangle \geq \cos^2 \langle \mathbf{Z}_t, \mathbf{V} \rangle - 4\alpha_t^2 \|\mathbf{A}_t\|_2^2 \|\mathbf{Y}_t\|_2^2 \pm O(\alpha_t^3).$$

□

### Proof of Lemma 4.6

*Proof.* By Lemma 4.5 and 4.6, we have

$$\begin{aligned} 1 - \mathbb{E}[\cos^2 \langle \mathbf{X}_{t+1}, \mathbf{V} \rangle] &\leq 1 - \mathbb{E}[\cos^2 \langle \mathbf{Z}_t, \mathbf{V} \rangle] + 4\beta_t \alpha_t^2 \pm O(\alpha_t^3) \\ &\leq (1 - \alpha_t \tau)(1 - \mathbb{E}[\cos^2 \langle \mathbf{X}_t, \mathbf{V} \rangle]) + 9\beta_t \alpha_t^2 \pm O(\alpha_t^3). \end{aligned}$$

Thus, we can write

$$\Theta_{t+1} \leq (1 - \alpha_t \tau) \Theta_t + \gamma \beta_t \alpha_t^2,$$

for some constant  $\gamma > 9$ .

□

**Remark** From the proof of Lemma 4.4, given  $\cos^2 \langle \mathbf{X}_t, \mathbf{V} \rangle \geq 1/2$ , we have that

$$1 - \cos^2 \langle \mathbf{Z}_t, \mathbf{V} \rangle \leq (1 - \alpha_t \tau)(1 - \cos^2 \langle \mathbf{X}_t, \mathbf{V} \rangle) + 5b_t \alpha_t^2 + O(\alpha_t^3),$$

which combined with Lemma 4.5 yields

$$1 - \cos^2 \langle \mathbf{X}_{t+1}, \mathbf{V} \rangle \leq (1 - \alpha_t \tau)(1 - \cos^2 \langle \mathbf{X}_t, \mathbf{V} \rangle) + 5b_t \alpha_t^2 + O(\alpha_t^3).$$

Then with  $\alpha_t = \frac{c}{t}$  where  $c > 0$ , we have

$$\begin{aligned} 1 - \cos^2 \langle \mathbf{X}_{t+1}, \mathbf{V} \rangle &\leq \frac{1}{2} \left(1 - \frac{c\tau}{t}\right) + \frac{5b_t c^2}{t^2} + O\left(\frac{1}{t^3}\right) \\ &= \frac{1}{2} - \frac{c}{t} \left(\frac{\tau}{2} - \frac{5b_t c}{t}\right) - O\left(\frac{1}{t^2}\right). \end{aligned}$$

Thus, when  $t$  is sufficiently large, we get  $1 - \cos^2 \langle \mathbf{X}_{t+1}, \mathbf{V} \rangle \leq \frac{1}{2}$ , i.e.,  $\cos^2 \langle \mathbf{X}_{t+1}, \mathbf{V} \rangle \geq \frac{1}{2}$ . This says that for  $t > s$  where  $s$  is sufficiently large,  $\cos^2 \langle \mathbf{X}_t, \mathbf{V} \rangle \geq 1/2$  implies  $\cos^2 \langle \mathbf{X}_{t+1}, \mathbf{V} \rangle \geq 1/2$ .

### Proof of Theorem 4.2

*Proof.* We only need to prove that there exists a sufficiently large constant  $\sigma > 0$  such that  $\Theta_t \leq \frac{\sigma}{t}$ . Induction is employed. It's clear that  $\Theta_s$  satisfies the inequality. Suppose it holds for  $t > s$ . Then by Lemma 4.6 as well as assumptions that  $c\tau > 2$  and  $\sigma$  is sufficiently large,

$$\begin{aligned} \Theta_{t+1} &\leq \left(1 - \frac{c}{t}\tau\right) \frac{\sigma}{t} + \gamma \beta_t \frac{c^2}{t^2} \\ &= \frac{1}{t^2} (\sigma(t - c\tau) + \gamma \beta_t c^2) \\ &= \frac{1}{t^2} (\sigma(t - 1) + \sigma(1 - c\tau) + \gamma \beta_t c^2) \\ &\leq \frac{1}{t^2} (\sigma(t - 1) - (\sigma - \gamma \beta_t c^2)) \\ &\leq \frac{\sigma(t - 1)}{t^2} \leq \frac{\sigma(t - 1)}{t^2 - 1} = \frac{\sigma}{t + 1}. \end{aligned}$$

□

Performance on Dense Matrices

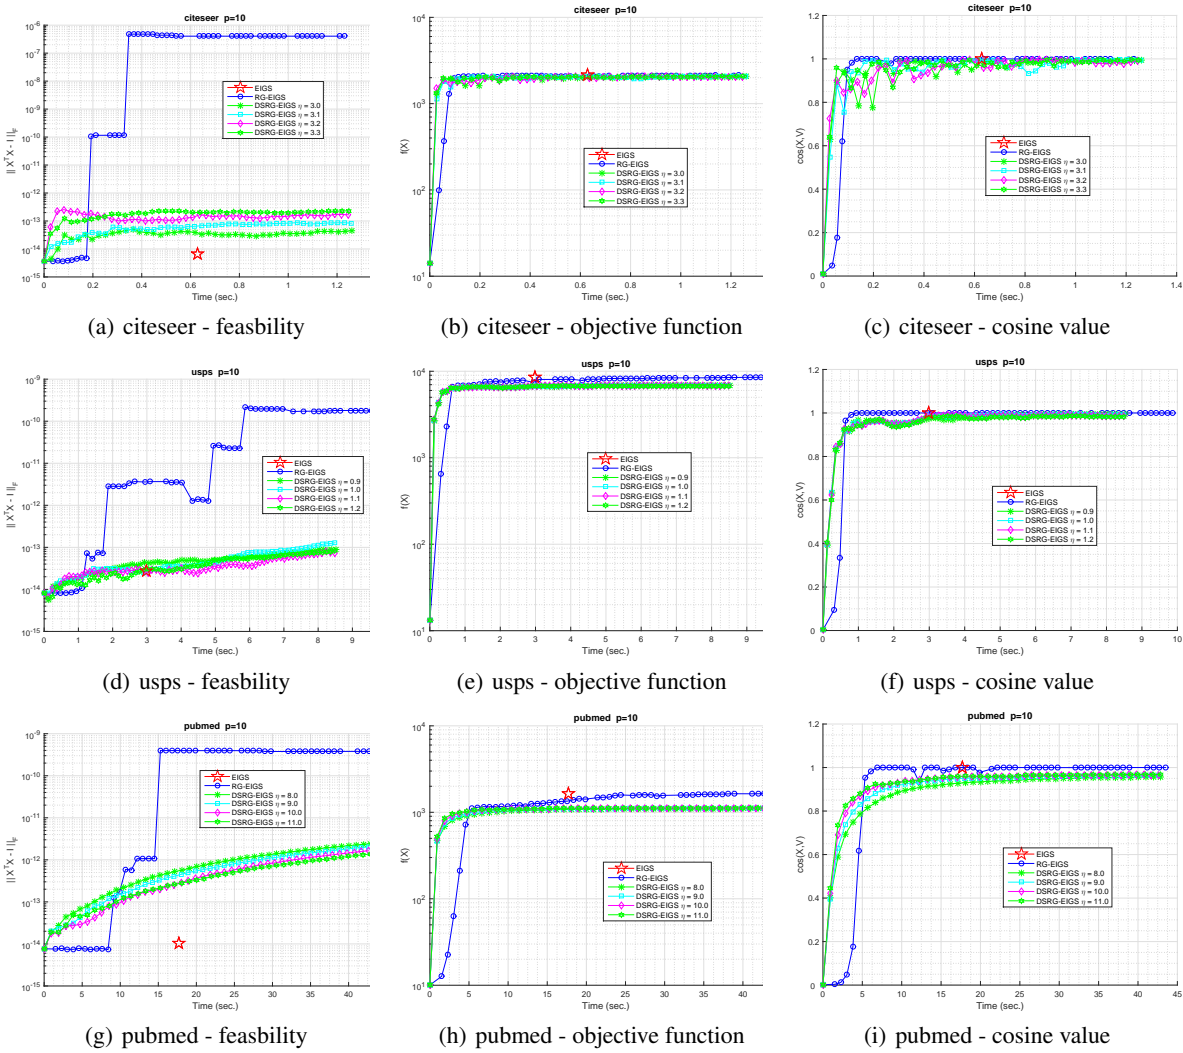

Figure 1. Performance on dense matrices.

References

Balsubramani, Akshay, Dasgupta, Sanjoy, and Freund, Yoav. The fast convergence of incremental PCA. In *Advances in Neural Information Processing Systems 26, December 5-8, 2013, Lake Tahoe, Nevada, United States.*, pp. 3174–3182, 2013.

Xie, Bo, Liang, Yingyu, and Song, Le. Scale up nonlinear component analysis with doubly stochastic gradients. *CoRR*, abs/1504.03655, 2015.
